# Supplementary material for: Novel two-dimensional Bi4V2O11 nanosheets: controllable synthesis, characterization and insight into the band structure
Source: Royal Society of Chemistry journal article supplement (doi:10.1039/c7ce02151h), 2018-01-01
Supplement: c7ce02151h1.pdf [file c7ce02151h1.pdf]

# Electronic Supplementary Information

## **Novel two-dimensional Bi<sub>4</sub>V<sub>2</sub>O<sub>11</sub> nanosheets: controllable synthesis, characterization and band structure insight**

Lulu Qiao <sup>a</sup>, Anquan Zhu <sup>a</sup>, Wenwen Liu <sup>a</sup>, Dewei Chu<sup>b</sup> and Jun Pan<sup>\*, a</sup>

<sup>a</sup> State Key Laboratory for Powder Metallurgy, Central South University, Changsha  
410083, P. R. China

<sup>b</sup> School of Materials Science and Engineering, University of New South Wales, Sydney,  
2052, NSW, Australia

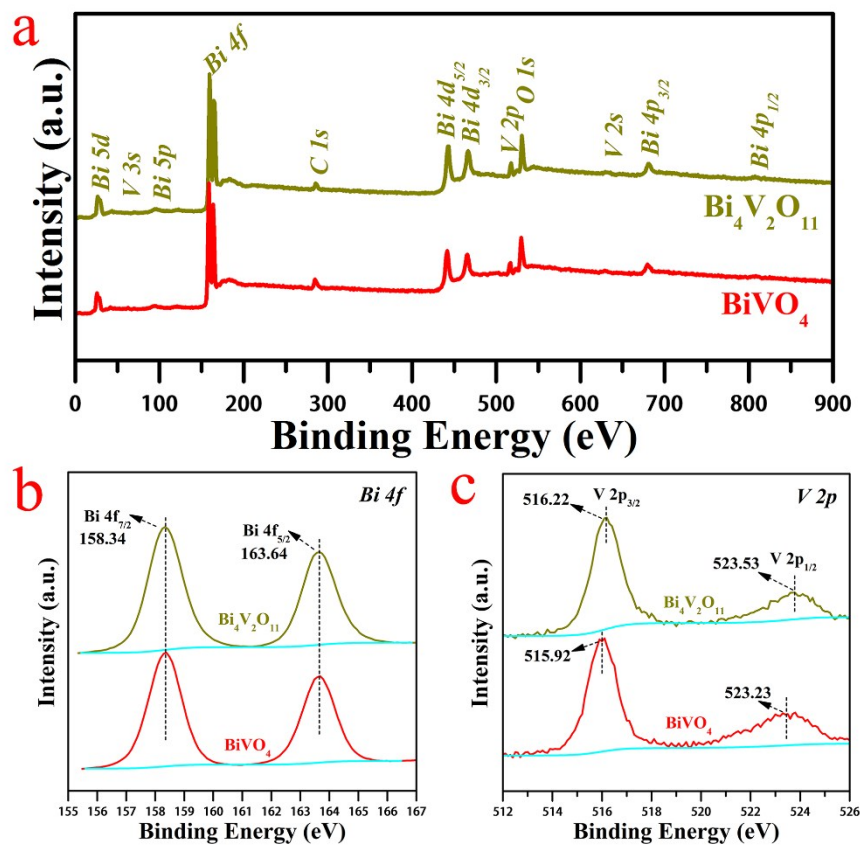

**Fig S1.** The full range XPS spectrum of  $\text{Bi}_4\text{V}_2\text{O}_{11}$  and  $\text{BiVO}_4$  (a); the high-resolution spectrum of (b) Bi 4f and (c) V 2p.
